# Supplementary material for: Nitrogen-doped carbon nanotube supported double-shelled hollow composites for asymmetric supercapacitors
Source: Royal Society of Chemistry journal article supplement (doi:10.1039/c7nj03422a), 2017-11-20
Supplement: c7nj03422a1.pdf [file c7nj03422a1.pdf]

## Supporting Information

### **Nitrogen-doped carbon nanotubes supported double-shelled hollow composite for asymmetric supercapacitor**

Yayun Zheng<sup>a</sup>, Jie Xu<sup>a\*</sup>, Yan Zhang<sup>b</sup>, Xiaoshan Yang<sup>a</sup>, Yingjiu Zhang<sup>a\*</sup>, Yuanyuan Shang<sup>a</sup>

<sup>a</sup> School of Physical Engineering and Key Laboratory of Material Physics, Ministry of Education, Zhengzhou University, NO. 75, Daxue Road, Zhengzhou 450052, China

<sup>b</sup> Collage of Physics and Telecommunication Engineering, Zhoukou Normal University, Zhoukou 466001, China

\* Corresponding author: Tel. +86 371 67766870, Fax. +86 371 67766629

*E-mail address:* [xujie@zzu.edu.cn](mailto:xujie@zzu.edu.cn); [zhangyj2006@zzu.edu.cn](mailto:zhangyj2006@zzu.edu.cn)

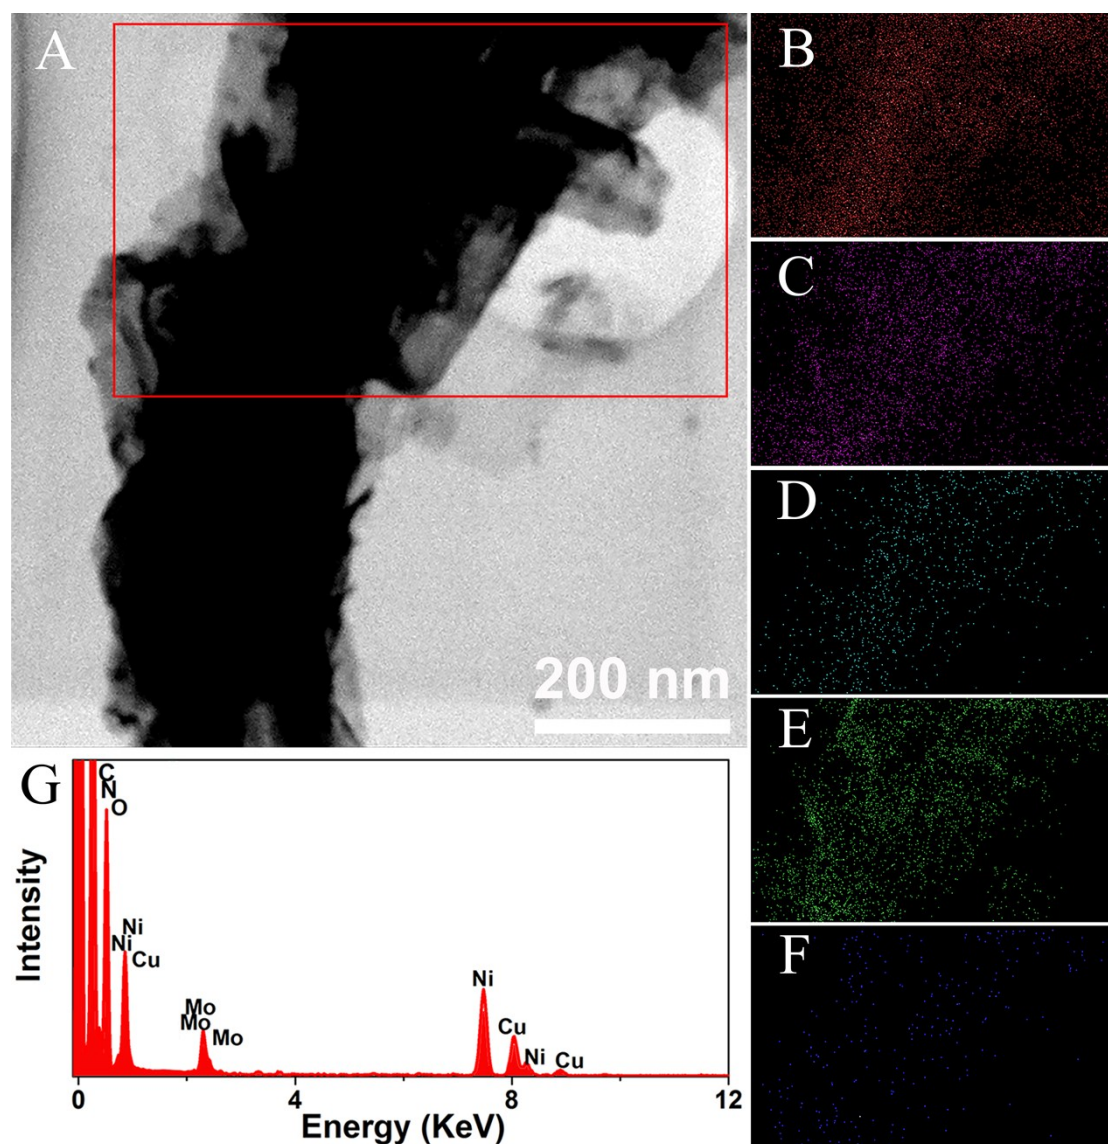

**Fig. S1** STEM image of double-shelled hollow N-C@NiMoO<sub>4</sub> composite (A), the EDS mapping results revealing the spatial distribution of the C (B), O (C), N (D), Ni (E), Mo (F), and EDS spectrum of N-C@NiMoO<sub>4</sub> composite (G).

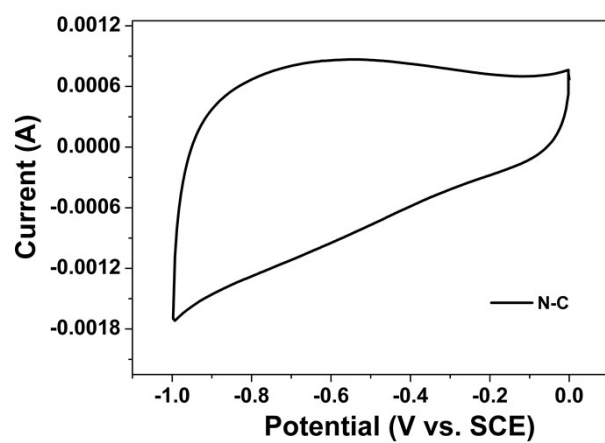

**Fig. S2** CV curve of N-C NTs electrodes at a scan rate of 10 mV s<sup>-1</sup> in the three-electrode system.
